# Supplementary material for: Solving Generalized Polyomino Puzzles Using the Ising Model
Source: MDPI journal article supplement (doi:10.3390/e24030354), 2022-02-28
Supplement: s1 [file s1]

# Supplementary Materials

## Solving Generalized Polyomino Puzzles Using the Ising Model

Kazuki Takabatake, Keisuke Yanagisawa, and Yutaka Akiyama\*

Department of Computer Science, School of Computing, Tokyo Institute of Technology, Meguro-ku, Tokyo 152-8550, Japan

[takabatake@bi.c.titech.ac.jp](mailto:takabatake@bi.c.titech.ac.jp) (K.T.); [yanagisawa@c.titech.ac.jp](mailto:yanagisawa@c.titech.ac.jp) (K.Y.).

\* Correspondence: [akiyama@c.titech.ac.jp](mailto:akiyama@c.titech.ac.jp)

Figure S1 shows the probability of reaching the optimal solution for various number of polyomino types and  $t_{max}$ . For each of three boards, the probabilities of reaching the optimal solution at  $t_{max} = 200$  and  $t_{max} = 500$  were almost equal, indicating that  $t_{max}$  of approximately 200 was sufficient for the search performance. When the size of the polyomino set was small, there was no difference by  $t_{max}$  because the scale of the problem was small, while the difference by  $t_{max}$  increased when the size of the polyomino set was large.

In the case of Original board with shorter simulation time,  $t_{max} = 50$ , there was a saturation of probability improvement when the number of polyominoes exceeds 30, and even degrading when it was over 40. This may suggest two different aspects of increasing candidates: the richer polyomino set makes the problem easier, but the increasing number of total neurons makes it difficult to find minimums quickly.

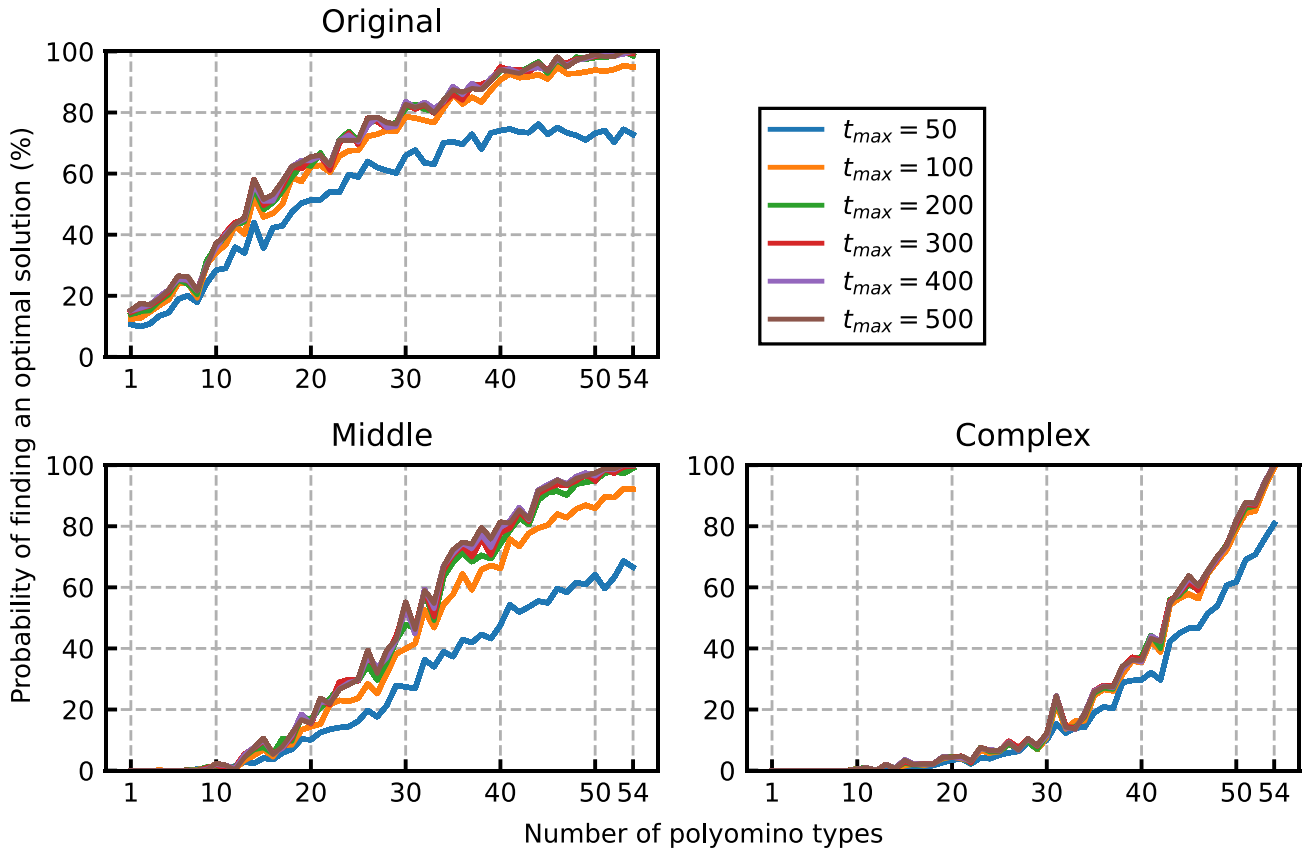

**Figure S1.** Probability of reaching the optimal solution for the number of polyomino types and  $t_{max}$ .
